# Supplementary material for: Spontaneous vesiculation: a mechanistic insight from the study of hybrid peptide molecules
Source: Royal Society of Chemistry journal article supplement (doi:10.1039/c6nj02643e), 2016-01-01
Supplement: c6nj02643e1.pdf [file c6nj02643e1.pdf]

## Electronic Supplementary Information (ESI)

# Spontaneous vesiculation: A mechanistic insight from the study of hybrid peptide molecules

Appa Rao Sapala<sup>[a]</sup>, Jayanta kundu <sup>[a]</sup>, Pramit Chowdhury\*<sup>[a]</sup>, V. Haridas\*<sup>[a]</sup>

<sup>a</sup>Department of Chemistry, Indian Institute of Technology Delhi (IITD), Hauz Khas, New Delhi- 110016, India.

V. Haridas E-mail: haridasv@chemistry.iitd.ac.in; h\_haridas@hotmail.com; Tel: +91 01126591380;

Pramit. C, E-mail: pramitc@chemistry.iitd.ac.in; Tel: +91 01126591521

|                                                               |         |
|---------------------------------------------------------------|---------|
| <b>Table of contents</b>                                      | S1      |
| I. Synthesis and characterization                             | S2-S3   |
| II. General procedure and Spectral data                       | S4-S10  |
| III. Microscopic studies                                      | S11-S15 |
| IV. Emission spectra of PRODAN and Confocal microscope images | S16     |
| V. Mechanism of assembly and References                       | S17     |

## **I. Synthesis and characterization:**

All solvents used in the reactions were dried. Amino acid L-Leucine was purchased from SRL India. Reactions were monitored by thin layer chromatography (TLC), and purifications were done by silica gel (100-200 mesh) column chromatography. Silica gel G (Merck) was used for TLC. Melting points were recorded on a Fisher-Scientific melting point apparatus and were uncorrected. IR spectra were recorded on a Nicolet, Protégé 460 spectrometer as KBr pellets. <sup>1</sup>H NMR spectra were recorded on Bruker-DPX-300 spectrometer using tetramethylsilane (<sup>1</sup>H) as an internal standard. High Resolution mass spectra (HRMS) were recorded in Bruker Micro-TOF-QII model using ESI technique. Optical rotations were measured using a Rudolph Research Analytical Autopol® V Polarimeter. Specific rotation was reported with concentrations in gram/100mL.

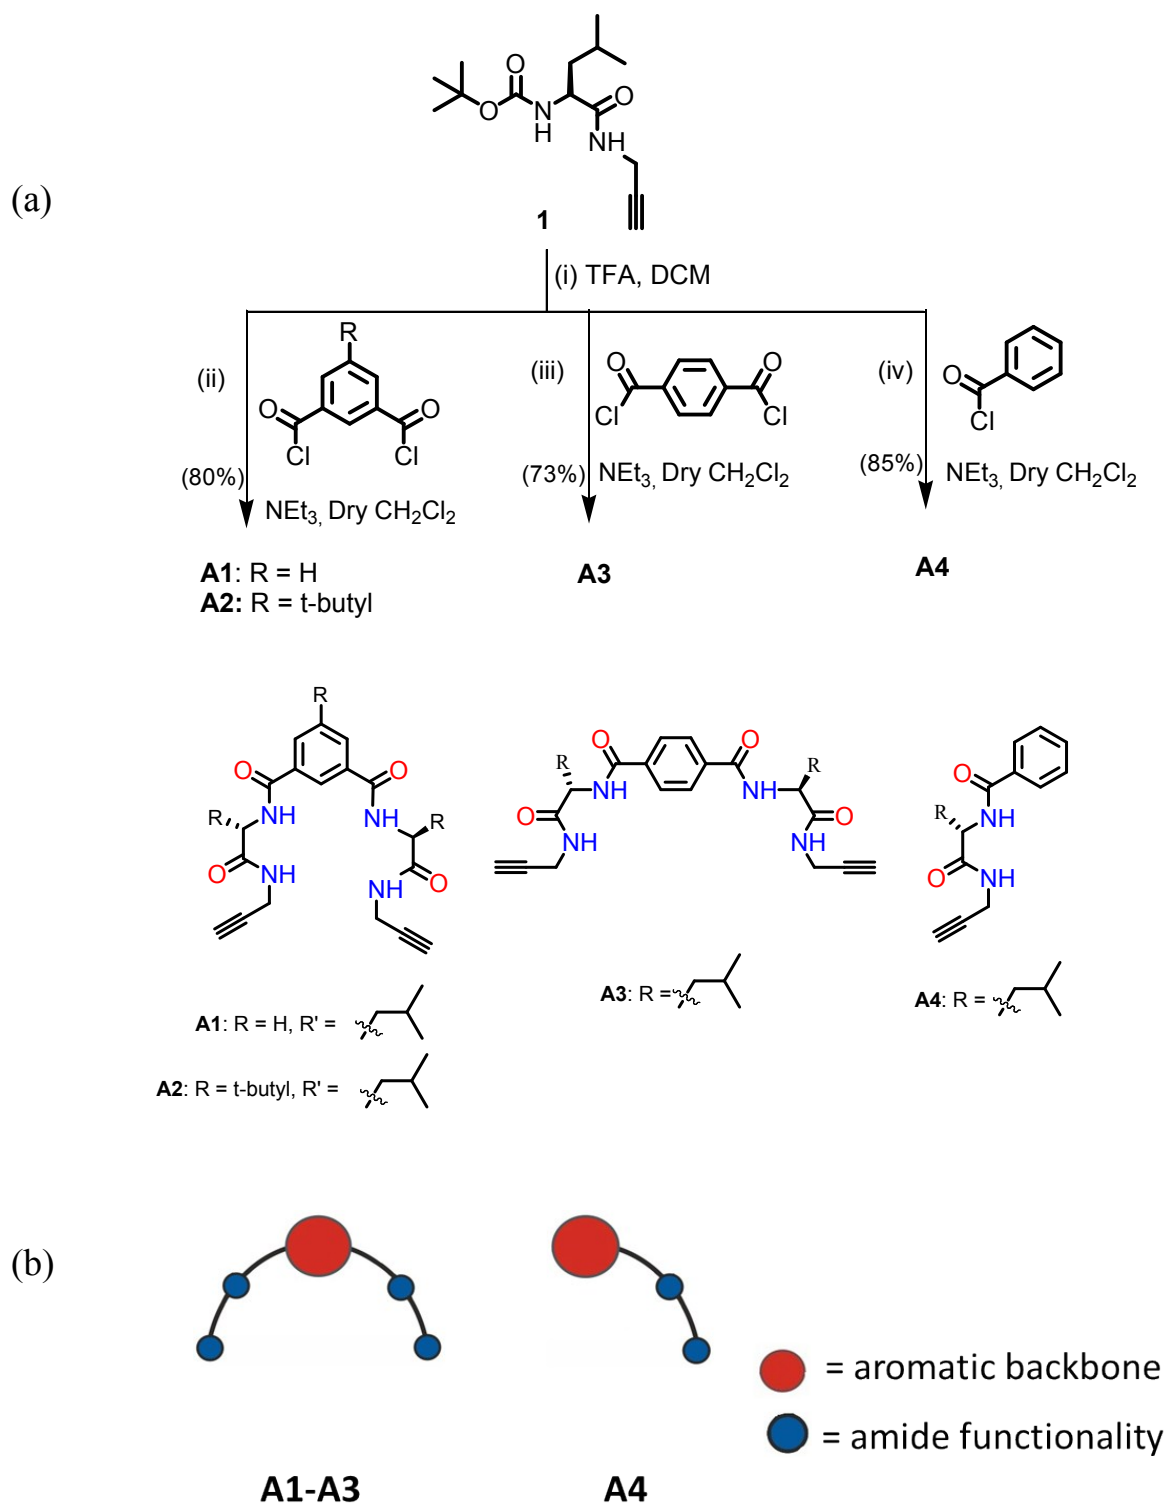

**Scheme S1:** (a) Synthesis of hybrid peptide molecules **A1-A4**. (b) Cartoon representation of hybrid peptide molecules **A1-A4**.

## General procedure for the synthesis of A1-A4:

### Compound 1 and A2 were synthesized based on the reported procedure.<sup>1</sup>

Compound 1 was dissolved in 50% TFA in dry CH<sub>2</sub>Cl<sub>2</sub> (~ 4mL), and stirred for 4h at 0 °C. It was subjected to vacuum to obtain the amine. Amine was then dissolved in dry CH<sub>2</sub>Cl<sub>2</sub> (~50 mL), added triethylamine (2 equivalents) stirred for 5 minutes, and the corresponding acid chloride in dry CH<sub>2</sub>Cl<sub>2</sub> (~50 mL) was added dropwise over 20 minutes. The reaction mixture was stirred for 12h at 0 °C, diluted with CH<sub>2</sub>Cl<sub>2</sub> (50 mL), washed sequentially with 2N H<sub>2</sub>SO<sub>4</sub>, NaHCO<sub>3</sub> and water. The organic layer was collected, dried over anhyd. Na<sub>2</sub>SO<sub>4</sub> and evaporated to the yield desired product.

#### Data of A1:

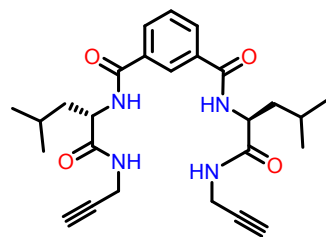

Yield: 80 %.

Appearance: White solid

Mp: 276-278 °C.

$[\alpha]_D^{34}$ : -3 (c = 0.1, CH<sub>3</sub>OH)

<sup>1</sup>H NMR (300 MHz, CDCl<sub>3</sub>): δ 0.96 (br d, 12H), 1.70-1.98 (br m, 2H+4H), 2.22 (s, 2H), 4.05 (q, 4H), 4.72 (m, 1H), 7.10-7.40 (br m, 2H+1H), 7.66 (br s, 2H), 7.81 (d, J = 7.5 Hz, 2H), 8.06 (s, 1H).

<sup>13</sup>C NMR (75 MHz, DMSO-*d*<sub>6</sub>): δ 21.9, 23.5, 24.9, 28.5, 52.2, 73.3, 81.6, 127.4, 128.5, 130.7, 134.7, 166.5, 172.4.

IR (KBr): 3298, 3072, 2957, 2350, 1647, 1522, 1248, 1170, 1034 cm<sup>-1</sup>.

HRMS: Calcd for C<sub>26</sub>H<sub>34</sub>N<sub>4</sub>O<sub>4</sub>Na m/z = 489.2472, found m/z = 489.2472.

### Data of A3

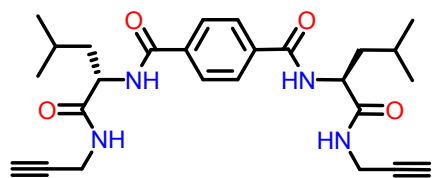

Yield: 85 %.

Appearance: White solid

Mp: 217-219 °C.

$[\alpha]_D^{34}$ : +1 (c = 0.1, CH<sub>3</sub>OH)

<sup>1</sup>H NMR (300 MHz, DMSO-*d*<sub>6</sub>): δ 0.73-.98 (br m, 12H), 1.49-1.78 (br m, 2H+4H), 3.10 (s, 2H), 3.87 (d, J = 3 Hz, 4H), 4.522 (br m, 2H), 7.98 (s, 4H), 8.47 (m, 2H), 8.59 (d, J = 8.1 Hz, 2H).

<sup>13</sup>C NMR (75 MHz, DMSO-*d*<sub>6</sub>): δ 21.4, 23.1, 24.4, 28.0, 51.7, 72.9, 81.2, 127.4, 136.3, 165.7, 172.0.

IR (KBr): 3281, 3069, 2952, 2369, 1631, 1544, 1336, 1288, 1117 cm<sup>-1</sup>.

HRMS: Calcd for C<sub>26</sub>H<sub>34</sub>N<sub>4</sub>O<sub>4</sub>Na m/z = 489.2472, found m/z = 489.2474.

### Data of A4

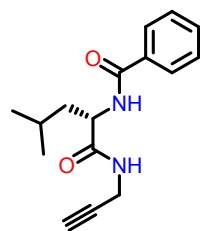

Yield: 85 %.

Appearance: White solid

Mp: 147-149 °C.

$[\alpha]_D^{34}$ : +9 (c = 0.1, CH<sub>3</sub>OH)

<sup>1</sup>H NMR (300 MHz, CDCl<sub>3</sub>): δ 0.98 (br d, 6H), 1.60-1.90 (br m, 1H+2H), 2.20 (s, 1H), 4.03 (q, 4H), 4.73 (m, 1H), 6.70 (m, 4H), 7.43 (t, 2H), 7.50 (d, J = 7.2 Hz, 1H), 7.79 (d, J = 7.2 Hz, 2H).

<sup>13</sup>C NMR (75 MHz, CDCl<sub>3</sub>): δ 22.3, 22.9, 24.9, 29.1, 52.1, 71.5, 79.3, 127.2, 128.5, 131.8, 133.7, 167.6, 172.2.

IR (KBr): 3285, 3071, 2957, 2350, 1653, 1557, 1247, 1176 cm<sup>-1</sup>.

HRMS: Calcd for C<sub>30</sub>H<sub>42</sub>N<sub>4</sub>O<sub>4</sub>Na m/z = 295.1417 found m/z = 295.1420

1,3 ILPA

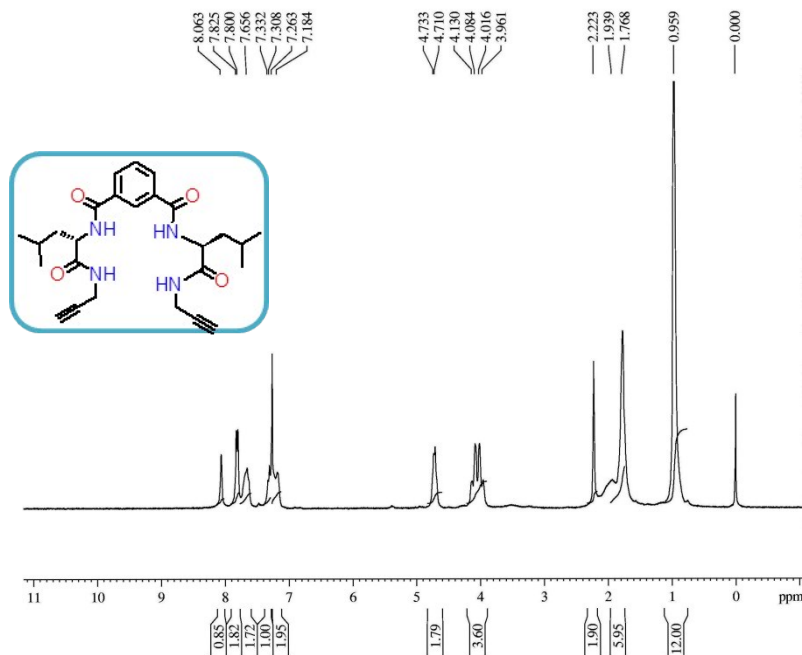

<sup>1</sup>H NMR (300 MHz, CDCl<sub>3</sub>) spectrum of A1

iso leu prop amide 13c

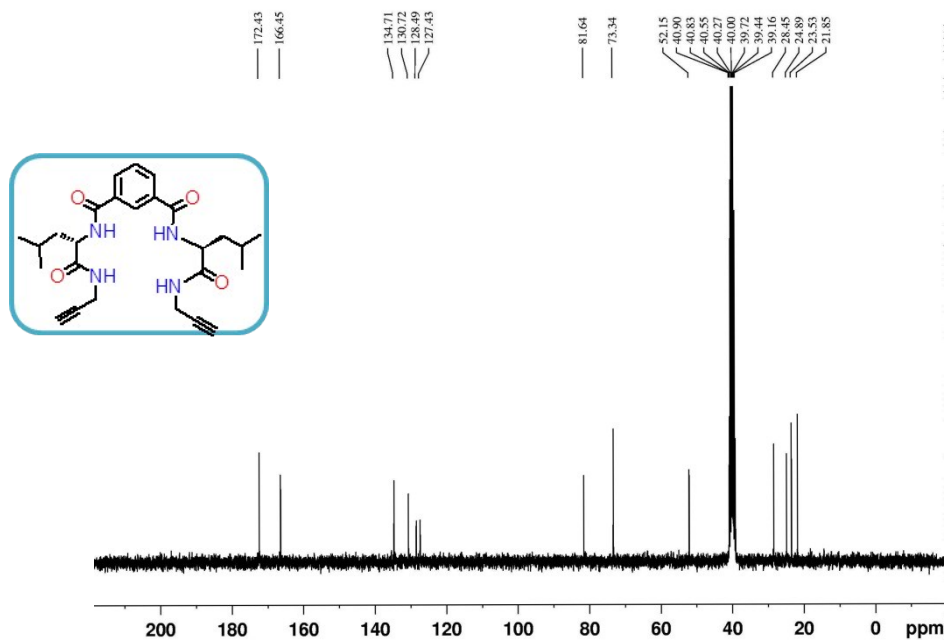

<sup>13</sup>C NMR (75 MHz, DMSO-*d*<sub>6</sub>) spectrum of A1

**Acquisition Parameter**

|             |          |                       |           |                  |           |
|-------------|----------|-----------------------|-----------|------------------|-----------|
| Source Type | ESI      | Ion Polarity          | Positive  | Set Nebulizer    | 0.3 Bar   |
| Focus       | Active   | Set Capillary         | 4500 V    | Set Dry Heater   | 180 °C    |
| Scan Begin  | 50 m/z   | Set End Plate Offset  | -500 V    | Set Dry Gas      | 4.0 l/min |
| Scan End    | 3000 m/z | Set Collision Cell RF | 500.0 Vpp | Set Divert Valve | Source    |

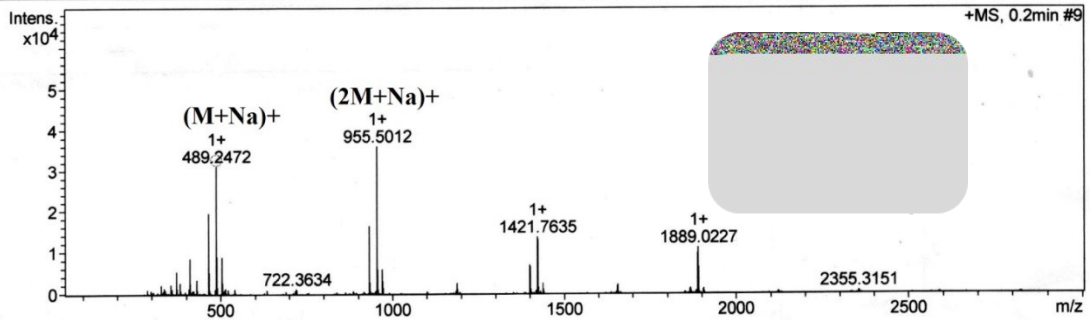

| Meas. m/z # | Ion Formula                                                       | m/z        | err [ppm] | Mean err [ppm] | rdB  | N-Rule | e <sup>-</sup> Conf | mSigm a | Std I | Std Mean m/z | Std VarNo | Std m/z | Std Comb |
|-------------|-------------------------------------------------------------------|------------|-----------|----------------|------|--------|---------------------|---------|-------|--------------|-----------|---------|----------|
| 489.247169  | 1 C <sub>26</sub> H <sub>34</sub> N <sub>4</sub> NaO <sub>4</sub> | 489.247226 | -0.1      | 1.3            | 11.5 | ok     | even                | 4.9     | 7.9   | 1.2          | 2.5       | 2.5     | 842.7    |

**Mass spectrum of A1**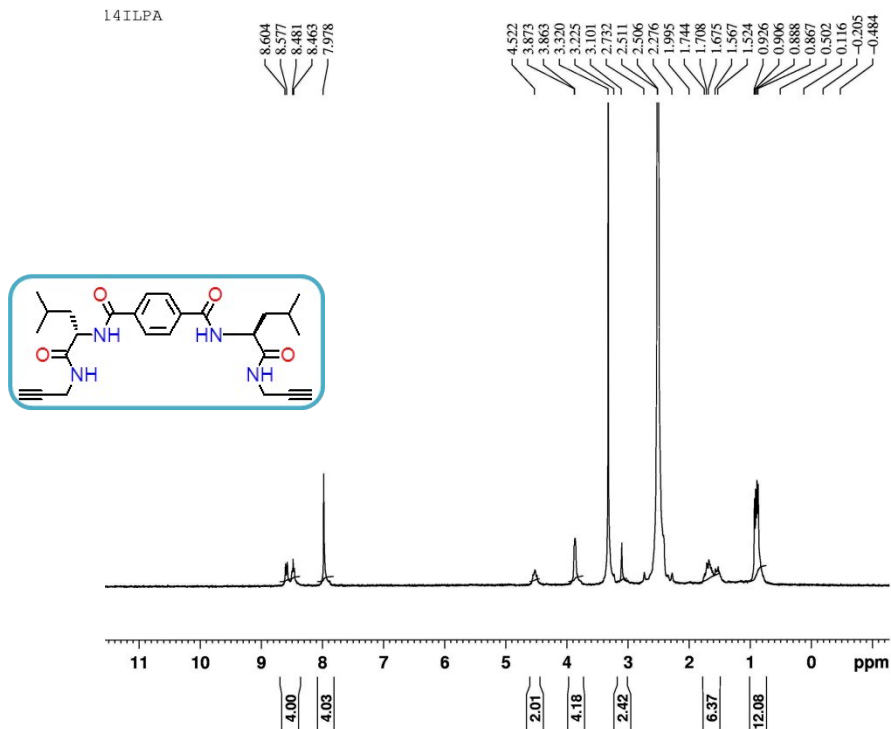

**<sup>1</sup>H NMR (300**

**MHz, DMSO-d<sub>6</sub>)**

**spectrum of A3**

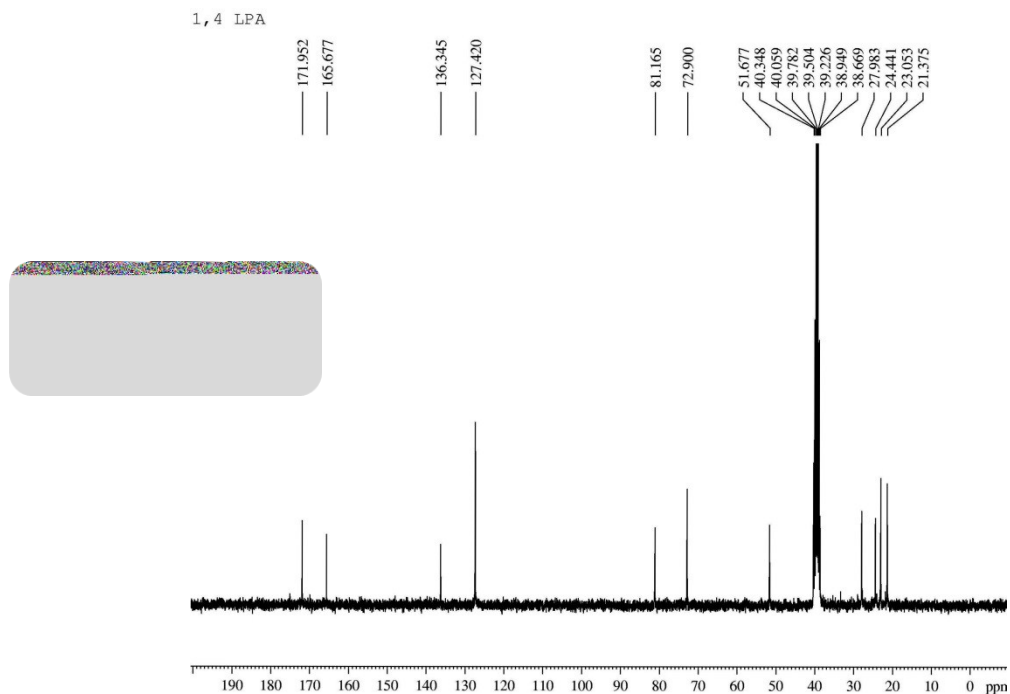

$^{13}\text{C}$  NMR (75 MHz,  $\text{DMSO-}d_6$ ) spectrum of A3

Acquisition Parameter

|             |          |                       |           |                  |           |
|-------------|----------|-----------------------|-----------|------------------|-----------|
| Source Type | ESI      | Ion Polarity          | Positive  | Set Nebulizer    | 0.3 Bar   |
| Focus       | Active   | Set Capillary         | 4500 V    | Set Dry Heater   | 180 °C    |
| Scan Begin  | 50 m/z   | Set End Plate Offset  | -500 V    | Set Dry Gas      | 4.0 l/min |
| Scan End    | 3000 m/z | Set Collision Cell RF | 500.0 Vpp | Set Divert Valve | Source    |

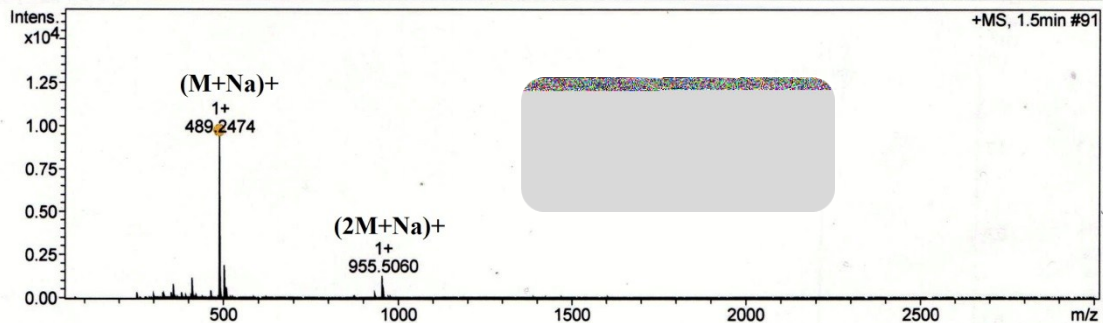

| Meas. m/z # | Ion Formula                                                       | m/z        | err [ppm] | Mean err [ppm] | rdB  | N-Rule | e <sup>-</sup> Conf | mSigm | Std I a | Std Mean m/z | Std I VarNo rm | Std m/z Diff | Std Comb Dev |
|-------------|-------------------------------------------------------------------|------------|-----------|----------------|------|--------|---------------------|-------|---------|--------------|----------------|--------------|--------------|
| 489.247387  | 1 C <sub>26</sub> H <sub>34</sub> N <sub>4</sub> NaO <sub>4</sub> | 489.247226 | 0.3       | -2.0           | 11.5 | ok     | even                | 16.9  | 29.8    | 1.6          | 10.5           | 2.7          | 842.7        |

Mass spectrum of A3



Bn LPA

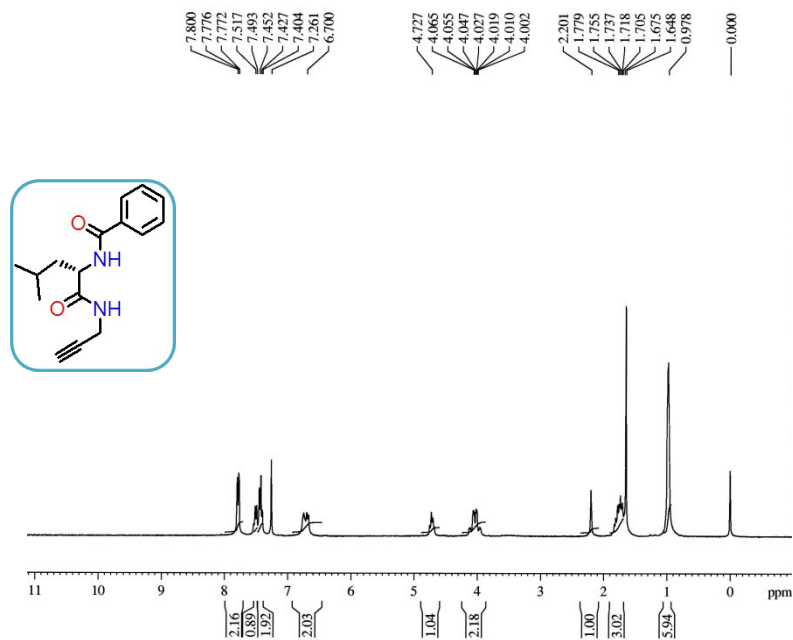

<sup>1</sup>H NMR (300

MHz, CDCl<sub>3</sub>)

spectrum of

A4

Bn LPA 13c

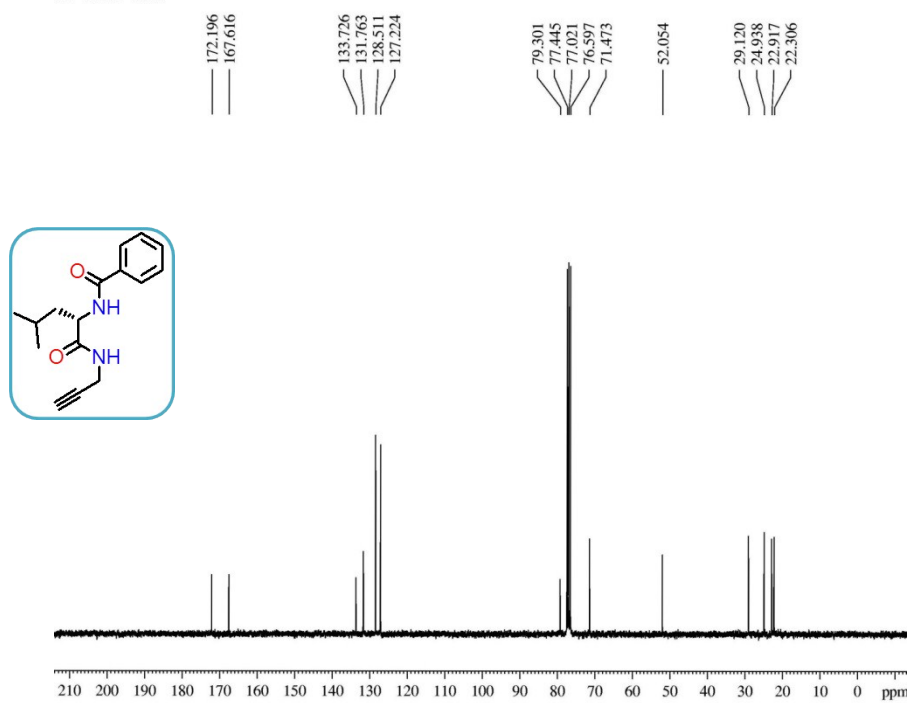

# $^{13}\text{C}$ NMR (75 MHz, $\text{CDCl}_3$ ) spectrum of A4

## Acquisition Parameter

|             |          |                       |           |                  |           |
|-------------|----------|-----------------------|-----------|------------------|-----------|
| Source Type | ESI      | Ion Polarity          | Positive  | Set Nebulizer    | 0.3 Bar   |
| Focus       | Active   | Set Capillary         | 4500 V    | Set Dry Heater   | 190 °C    |
| Scan Begin  | 50 m/z   | Set End Plate Offset  | -500 V    | Set Dry Gas      | 4.0 l/min |
| Scan End    | 1500 m/z | Set Collision Cell RF | 100.0 Vpp | Set Divert Valve | Source    |

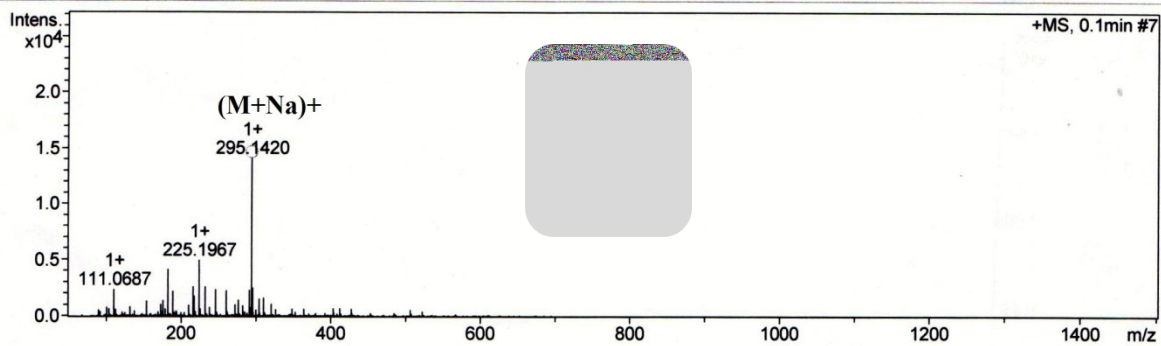

| Meas. m/z  | # | Ion Formula                                                     | Score  | m/z        | err [ppm] | Mean err [ppm] | mSigma | rdb | e <sup>-</sup> Conf | N-Rule |
|------------|---|-----------------------------------------------------------------|--------|------------|-----------|----------------|--------|-----|---------------------|--------|
| 295.142012 | 1 | C <sub>16</sub> H <sub>20</sub> N <sub>2</sub> NaO <sub>2</sub> | 100.00 | 295.141699 | -1.1      | -2.1           | 3.7    | 7.5 | even                | ok     |

## Mass spectrum of A4

### **III. Microscopic studies:**

#### **(a) Scanning Electron Microscopy (SEM)**

A 10  $\mu\text{l}$  solution of the compound was put on a fresh piece of glass, which is attached to a stub via carbon tape. The sample was allowed to evaporate at room temperature and coated with  $\sim 10\text{nm}$  of gold. All the samples were analyzed using ZEISS EVO 50 SEM.

#### **(b) Atomic Force Microscopy (AFM)**

Bruker Dimension Icon atomic force microscope was used for imaging the samples. About 10  $\mu\text{l}$  aliquot of the sample solution was placed on the freshly cleaved mica and allowed to dry. It was then imaged using tapping mode AFM.

#### **(c) High Resolution-Transmission Electron Microscopy (HR-TEM)**

Samples for HR-TEM were prepared by dissolving the compound in 1:1 methanol and chloroform mixture. A 2  $\mu\text{l}$  aliquot of the sample solution was placed on a 200 mesh copper grid allowed to dry at room temperature and samples were viewed using a TECHNAI G2 (20S-TWIN) electron microscope.

#### **(d) Confocal Microscopy**

Individual cover slips were mounted on the stage of an inverted microscope (Olympus), equipped with an water immersion objective (N.A.=1.2, 60x), both of these being components of our custom-built confocal microscope (NANONICS, Israel). The tracer dye, fluorescein, was excited with the 488 nm line of a CW argon-ion laser (Modu-Laser, Model: Stellar Pro. Select) while NR and R6G were excited by the 514 nm laser line. The laser was guided onto the dichroic using a single mode fiber. The fluorescence from the

samples was collected with the same objective and focused onto an avalanche photo diode (Model: SPCM-AQRH-14, CANADA), fitted with a 50  $\mu\text{m}$  confocal pinhole, using a non-polarizing beamsplitter. The samples were scanned using a separate  $x$ - $y$  closed loop piezo scanner (Nanonics Imaging). For all experiments, piezo scanning and data acquisition were controlled with a HV Piezo Driver (Nanonics Imaging) and software (NWS11). For image acquisition the size of the field of view, resolution points and time exposure per points were 80 x 80  $\mu\text{m}$ , 300 and 3 ms/point respectively.

## Materials

Nile red (9-Diethylamino-benzo[ $\alpha$ ]phenoxazin-5-one), PRODAN (1-(6-Dimethylamino-naphthalen-2-yl)-propan-1-one) and fluorescein sodium salt (2-(3-Oxo-6-oxydo-3H-xanthén-9-yl)benzoate di sodium) and rhodamine 6G were purchased from Sigma-Aldrich Chemical Co. (USA) and were used as received.

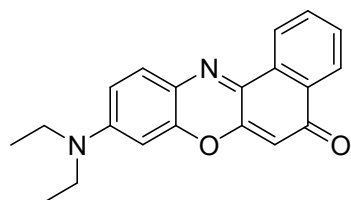

(A) Nile red (NR)

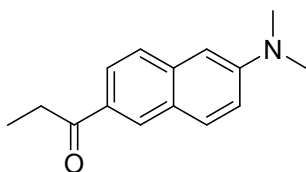

(B) PRODAN

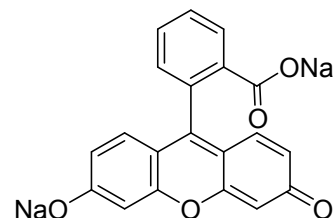

(C) Fluorescein sodium salt

## Preparation of solutions for confocal imaging

For confocal imaging experiments different concentrations (0.25 mM, 0.5 mM and 1 mM) of **A2** were dissolved in chloroform-ethanol (1:1) mixture after weighing out the appropriate amounts using a Precisa XB 120A (Sweden) analytical balance to get the desired concentration. Fluorescein dye (100  $\mu\text{M}$ ) was mixed with each of the solutions and incubated for sufficient time for proper equilibration. A few microliters of these solutions of **A2** were placed on washed cover slips and

allowed to dry. Subsequently, the excess dye was washed away with sufficient amount of water and then the cover slip was dried again prior to imaging. A similar methodology was also followed for the NR and R6G imaging studies.

### **Dye encapsulation studies**

Stock solutions of Nile red (NR) and PRODAN were prepared in methanol. The concentrations of NR and PRODAN were measured with a UV-Vis spectrophotometer (Model UV-2600, Shimadzu) in the range of 300-750 nm (for NR) and 200 - 500 nm (for PRODAN). The molar extinction coefficients of NR<sup>2</sup> and PRODAN<sup>3</sup> used were as follows: 45,000 M<sup>-1</sup> cm<sup>-1</sup> at 552 nm and 18,400 M<sup>-1</sup> cm<sup>-1</sup> at 360 nm in methanol respectively. The solutions of **A2** with various concentrations (0.25 mM, 0.5 mM and 1mM) were prepared by following the abovementioned procedure. Appropriate amounts of the stock solution of the dyes were added to 1 ml of **A2** containing solutions to get the desired concentrations. Absorption spectra of NR and PRODAN in presence of varying concentrations of **A2** were acquired by using 1 cm quartz cuvettes, with temperature being maintained at 25 °C. The concentrations of NR and PRODAN used were 5 μM and 7 μM respectively.

### **(e) Fluorescence Measurements**

All the steady-state fluorescence experiments were carried out on the FLS900 spectrofluorometer (Edinburgh, UK). Emission spectra of Nile red containing solutions of **A2** were obtained upon excitation at 500 nm and spectra were collected from 520 to 800 nm. The PRODAN containing solutions of **A2** were excited at 340 nm and the emission spectra were recorded from 360 to 650 nm. The concentrations of NR and PRODAN were kept at 5 μM and 7 μM respectively. The

fluorescence measurements were carried out by using 1 cm quartz cuvettes and the temperature was maintained at 25 °C using a Peltier based cooler (Quantum Northwest).

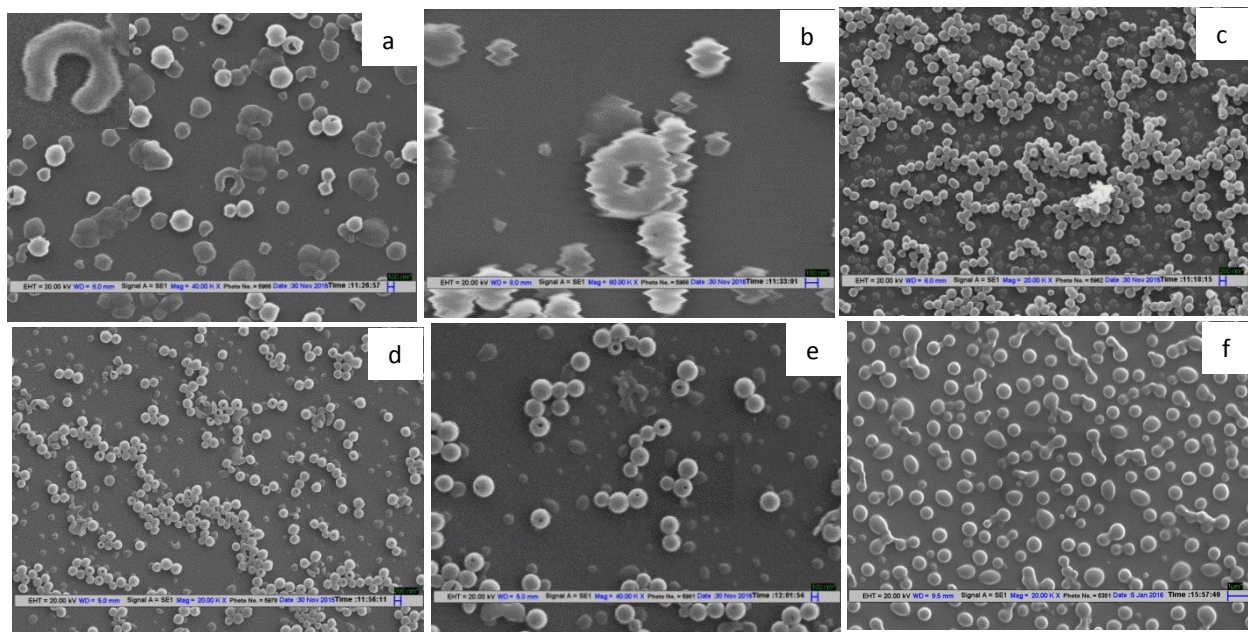

**Figure S1:** SEM images of (a-b) **A1** at 0.5 mM (Inset: showing single magnified hemi-toroid). (c) **A1** at 1 mM (d-e) **A2** at 0.5 mM. (f) **A2** at 1 mM.

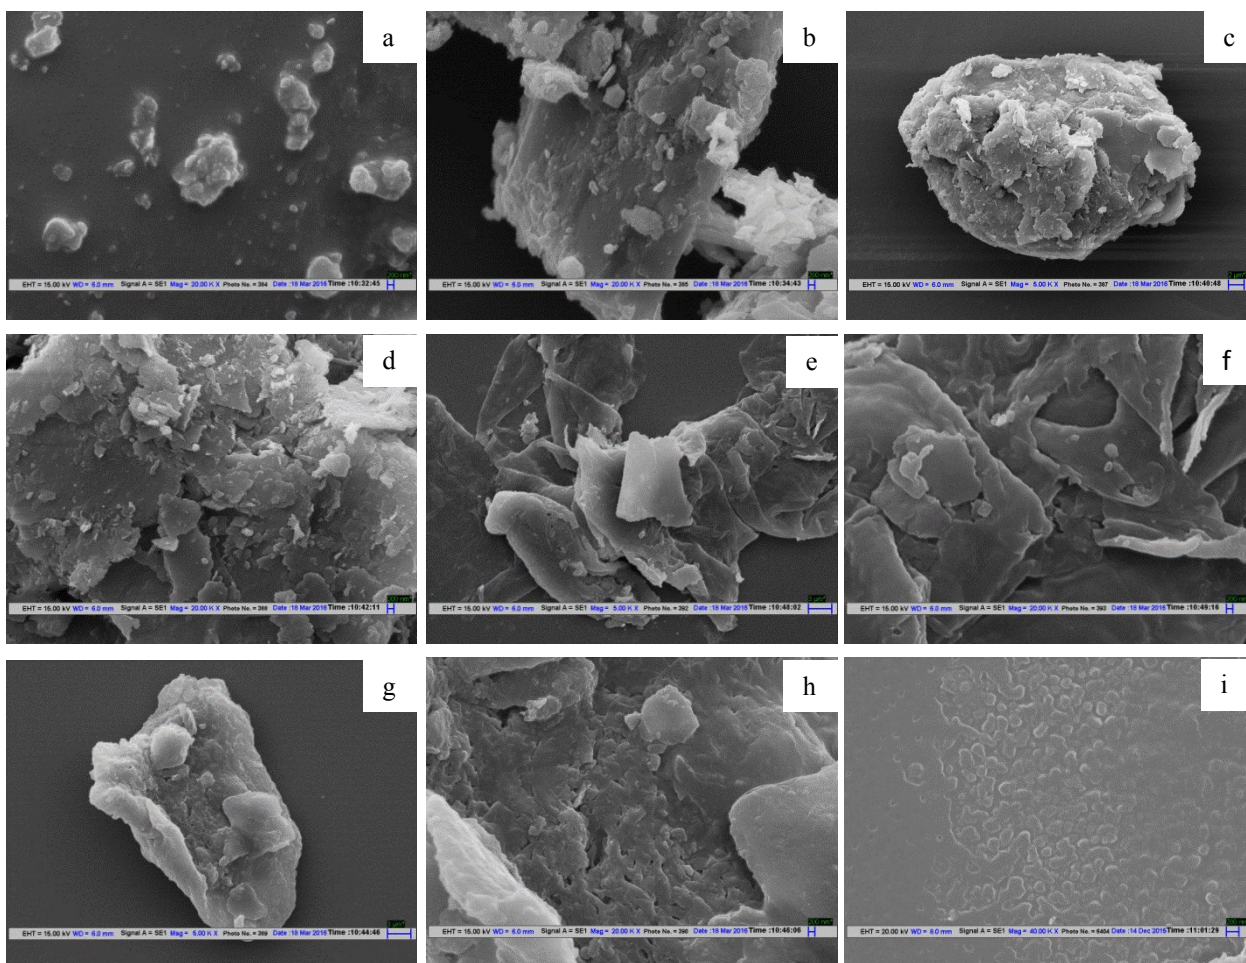

**Figure S2:** SEM image of **A2** in (a-b) THF: Tetra hydrofuran at 0.5 mM and 1 mM (c-d) Ethyl acetate:  $\text{CH}_3\text{COOC}_2\text{H}_5$  at 0.5 mM and 1 mM (e-f) Acetone:  $\text{CH}_3\text{COCH}_3$  at 0.5 mM and 1 mM (g-h) Isopropanol:  $(\text{CH}_3)_2\text{CHOH}$  at 0.5 mM and 1 mM (i-j) Chloroform:  $\text{CHCl}_3$  (1 mM).

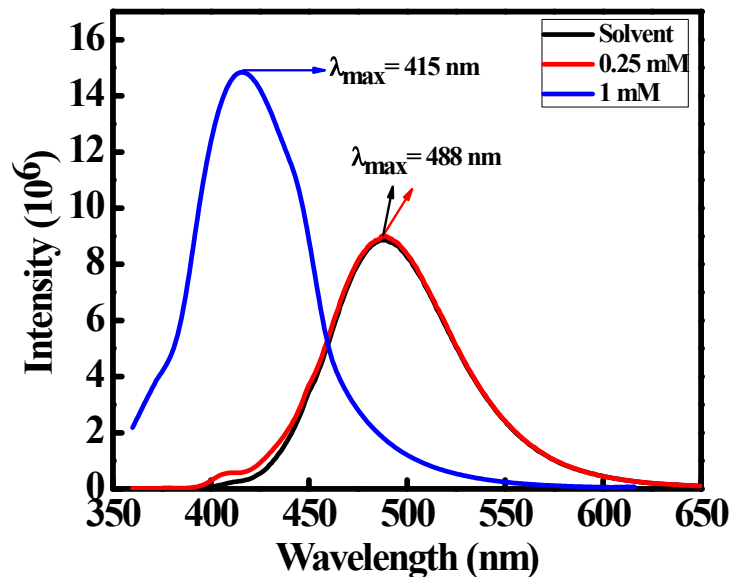

**Figure S3:** Emission spectra of PRODAN as a function of the concentration of A2 as indicated in the figure legend.  $\lambda_{\text{exc}} = 340 \text{ nm}$ .

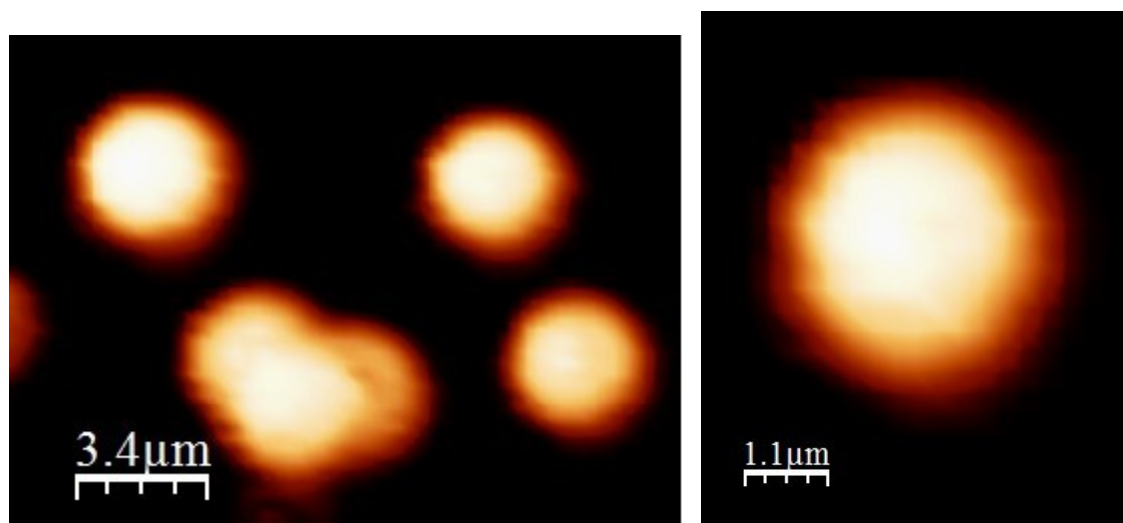

**Figure S4:** Confocal fluorescence images of the vesicles formed from 1 mM A2 with the dye used here being R6G. Since R6G has no special affinity for partitioning into hydrophobic regions, thus the whole vesicle remains uniformly illuminated very similar to that observed for fluorescein



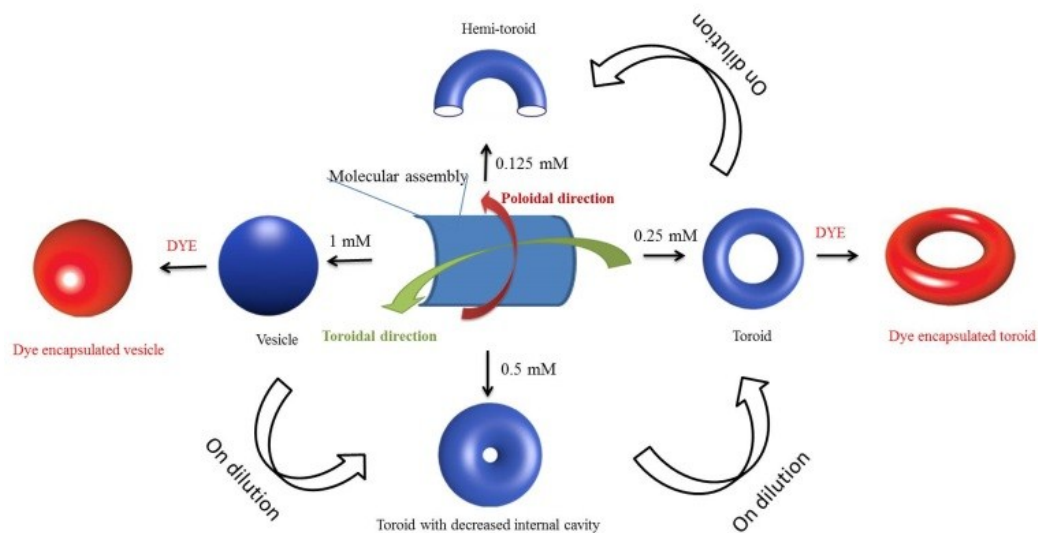

**Figure S5:** Schematic representation of the mechanism describing self-assembly at different concentrations and showing their encapsulation studies in red color (toroid and vesicle) and effect of dilution on self-assembly.

### References:

1. V. Haridas, A. R. Sapala and J. P. Jasinski, *Chem Commun*, 2015, **51**, 6905–6908.
2. M. Adeli, H. Namazi, F. Du, S. Hönzke, S. Hedtrich, J. Keilitza and R. Haag, *RSC Adv.*, 2015, **5**, 14958-14966.
3. G. Weber and F. J. Farris, *Biochemistry*, 1979, **18**, 3075-3078.
